# Supplementary material for: T Cell Receptor Immune Repertoires Are Promptly Reconstituted After Methicillin-Resistant Staphylococcus aureus Infection
Source: Front Microbiol. 2019 Aug 30;10:2012. doi: 10.3389/fmicb.2019.02012 (PMC6730595; doi:10.3389/fmicb.2019.02012)
Supplement: TABLE S1 — The analysis of TCRβ immune repertoire sequencing data. [file Table_1.XLSX]

## Sheet: Tcrb and Tcrd
	Beta chain	Blast reads	Total CDR3 reads	CDR3 reads/Blast read（%）	CDR3 AA clonotypes
Ctrl group	Sample1	8089889	7676876	94.8947	44570
	Sample2	9382975	9068652	96.6501	21736
	Sample3	8011641	7667996	95.7107	77633
	Sample4	5588604	5258057	94.0853	70404
MRSA group	Sample1	5685174	5403169	95.0396	81553
	Sample2	6029278	5773413	95.7563	102582
	Sample3	6343444	6015295	94.827	152178
	Sample4	5751304	5325170	92.5907	108912
	Delta chain	Blast reads	Total CDR3 reads	CDR3 reads/Blast read（%）	CDR3 AA clonotypes
Ctrl group	Sample1	5268001	5184101	95.7107	24996
	Sample2	5275330	3885074	95.7563	25427
	Sample3	4876879	3742712	96.6501	19027
	Sample4	7191132	6744874	92.5907	21870
MRSA group	Sample1	5932281	4823787	94.8947	27890
	Sample2	4883655	4459205	94.827	36905
	Sample3	5552194	5465129	95.0396	35147
	Sample4	5354144	4873269	94.0853	29336
